# Supplementary material
Source: PubMed Central journal article supplement (PMC4390999)
Supplement: NIHMS651472-supplement-3.pdf [file NIHMS651472-supplement-3.pdf]

**Table S1. References for Table 1**

| <b>Virus<br/>(Family)</b>                                  | <b>References</b>                                                                                                               |
|------------------------------------------------------------|---------------------------------------------------------------------------------------------------------------------------------|
| Bas-Congo<br>( <i>Rhabdoviridae</i> )                      | (Grard et al., 2012)                                                                                                            |
| MERS Coronavirus<br>( <i>Coronaviridae</i> )               | (Briese et al., 2014; Memish et al., 2013; van Boheemen et al., 2012; Zaki et al., 2012)                                        |
| Chikungunya ( <i>Togaviridae</i> )                         | (Enserink, 2007; Her et al., 2009; McCrae et al., 1971)                                                                         |
| Crimean-Congo hemorrhagic fever<br>( <i>Bunyaviridae</i> ) | (Flick and Whitehouse, 2005)                                                                                                    |
| Ebola<br>( <i>Filoviridae</i> )                            | (Amman et al., 2015; Biek et al., 2006; Leroy et al., 2005)                                                                     |
| Hanta<br>( <i>Bunyaviridae</i> )                           | (Easterbrook and Klein, 2008; Guo et al., 2013; Meyer and Schmaljohn, 2000; Schountz and Prescott, 2014; Schountz et al., 2007) |
| Hendra & Nipah<br>( <i>Paramyxoviridae</i> )               | (Eaton et al., 2006; Field et al., 2007; Halpin et al., 2011; Middleton et al., 2007; Middleton and Weingartl, 2012)            |
| Hepatitis E<br>( <i>Hepeviridae</i> )                      | (Dalton et al., 2013; Panda et al., 2007)                                                                                       |
| HIV<br>( <i>Retroviridae</i> )                             | (Kornfeld et al., 2005; Li et al., 2010; Mandl et al., 2008; Silvestri et al., 2003)                                            |
| Influenza A<br>( <i>Orthomyxoviridae</i> )                 | (Barber et al., 2010; Jourdain et al., 2010; Munster et al., 2007; Webby et al., 2007)<br>(Tong et al., 2012)                   |
| Lassa<br>( <i>Arenaviridae</i> )                           | (Charrel and de Lamballerie, 2010; Lecompte et al., 2006)                                                                       |
| Lymphocytic choriomeningitis<br>( <i>Arenaviridae</i> )    | (Jamieson et al., 2006)                                                                                                         |
| Menangle<br>( <i>Paramyxoviridae</i> )                     | (Barr et al., 2012; Chant et al., 1998; Philbey et al., 1998)                                                                   |
| SARS coronavirus<br>( <i>Coronaviridae</i> )               | (Lau et al., 2005; Li et al., 2005)                                                                                             |
| Rabies<br>( <i>Rhabdoviridae</i> )                         | (Rupprecht et al., 2011; Turmelle et al., 2010)                                                                                 |
| Rift Valley fever<br>( <i>Bunyaviridae</i> )               | (Flick and Bouloy, 2005; Olive et al., 2012)                                                                                    |
| West Nile<br>( <i>Flaviviridae</i> )                       | (Campbell et al., 2002; Kilpatrick, 2011)                                                                                       |
| Yellow fever<br>( <i>Flaviviridae</i> )                    | (Bugher, 1951; Woodall, 1968)                                                                                                   |

## Supplemental References

- Amman, B.R., Jones, M.E.B., Sealy, T.K., Uebelhoer, L.S., Schuh, A.J., Bird, B.H., Coleman-McCray, J.D., Martin, B.E., Nichol, S.T., and Towner, J.S. (2015). Oral shedding of marburg virus in experimentally infected Egyptian fruit bats (*Rousettus aegyptiacus*). *J Wildl Dis* 51.
- Barber, M.R., Aldridge, J.R., Jr., Webster, R.G., and Magor, K.E. (2010). Association of RIG-I with innate immunity of ducks to influenza. *Proceedings of the National Academy of Sciences of the United States of America* 107, 5913-5918.
- Barr, J.A., Smith, C., Marsh, G.A., Field, H., and Wang, L.F. (2012). Evidence of bat origin for Menangle virus, a zoonotic paramyxovirus first isolated from diseased pigs. *J Gen Virol* 93, 2590-2594.
- Biek, R., Walsh, P.D., Leroy, E.M., and Real, L.A. (2006). Recent common ancestry of Ebola Zaire virus found in a bat reservoir. *PLoS Pathog* 2, e90.
- Briese, T., Mishra, N., Jain, K., Zalmout, I.S., Jabado, O.J., Karesh, W.B., Daszak, P., Mohammed, O.B., Alagaili, A.N., and Lipkin, W.I. (2014). Middle East Respiratory Syndrome Coronavirus Quasispecies That Include Homologues of Human Isolates Revealed through Whole-Genome Analysis and Virus Cultured from Dromedary Camels in Saudi Arabia. *mBio* 5.
- Bugher, J.C. (1951). The mammalian host in yellow fever. In *Yellow Fever*, G.K. Strode, J.C. Bugher, J.A. Kerr, H.H. Smith, K.C. Smithburn, R.M. Taylor, M. Theiler, A.J. Warren, and L. Whitman, eds. (New York: McGraw-Hill Book Company, Inc.).
- Campbell, G.L., Marfin, A.A., Lanciotti, R.S., and Gubler, D.J. (2002). West Nile virus. *Lancet Infect Dis* 2, 519-529.
- Chant, K., Chan, R., Smith, M., Dwyer, D.E., and Kirkland, P. (1998). Probable human infection with a newly described virus in the family Paramyxoviridae. The NSW Expert Group. *Emerg Infect Dis* 4, 273-275.
- Charrel, R.N., and de Lamballerie, X. (2010). Zoonotic aspects of arenavirus infections. *Veterinary microbiology* 140, 213-220.
- Dalton, H.R., Hunter, J.G., and Bendall, R.P. (2013). Hepatitis E. *Curr Opin Infect Dis* 26, 471-478.
- Easterbrook, J.D., and Klein, S.L. (2008). Immunological mechanisms mediating hantavirus persistence in rodent reservoirs. *PLoS Pathog* 4, e1000172.
- Eaton, B.T., Broder, C.C., Middleton, D., and Wang, L.-F. (2006). Hendra and Nipah viruses: different and dangerous. *Nat Rev Microbiol* 4, 23.
- Enserink, M. (2007). Infectious diseases. Chikungunya: no longer a third world disease. *Science* 318, 1860-1861.
- Field, H.E., Mackenzie, J.S., and Daszak, P. (2007). Henipaviruses: emerging paramyxoviruses associated with fruit bats. *Curr Top Microbiol Immunol* 315, 133-159.
- Flick, R., and Bouloy, M. (2005). Rift Valley fever virus. *Curr Mol Med* 5, 827-834.
- Flick, R., and Whitehouse, C.A. (2005). Crimean-Congo hemorrhagic fever virus. *Curr Mol Med* 5, 753-760.
- Grard, G., Fair, J.N., Lee, D., Slikas, E., Steffen, I., Muyembe, J.J., Sittler, T., Veeraraghavan, N., Ruby, J.G., Wang, C., *et al.* (2012). A novel rhabdovirus associated with acute hemorrhagic Fever in central Africa. *PLoS Pathog* 8, e1002924.

Guo, W.P., Lin, X.D., Wang, W., Tian, J.H., Cong, M.L., Zhang, H.L., Wang, M.R., Zhou, R.H., Wang, J.B., Li, M.H., *et al.* (2013). Phylogeny and origins of hantaviruses harbored by bats, insectivores, and rodents. *PLoS Pathog* 9, e1003159.

Halpin, K., Hyatt, A.D., Fogarty, R., Middleton, D., Bingham, J., Epstein, J.H., Rahman, S.A., Hughes, T., Smith, C., Field, H.E., *et al.* (2011). Pteropid bats are confirmed as the reservoir hosts of henipaviruses: a comprehensive experimental study of virus transmission. *Am J Trop Med Hyg* 85, 946-951.

Her, Z., Kam, Y.W., Lin, R.T., and Ng, L.F. (2009). Chikungunya: a bending reality. *Microbes and infection / Institut Pasteur* 11, 1165-1176.

Jamieson, D.J., Kourtis, A.P., Bell, M., and Rasmussen, S.A. (2006). Lymphocytic choriomeningitis virus: an emerging obstetric pathogen? *American journal of obstetrics and gynecology* 194, 1532-1536.

Jourdain, E., Gunnarsson, G., Wahlgren, J., Latorre-Margalef, N., Brojer, C., Sahlin, S., Svensson, L., Waldenstrom, J., Lundkvist, A., and Olsen, B. (2010). Influenza virus in a natural host, the mallard: experimental infection data. *PLoS ONE* 5, e8935.

Kilpatrick, A.M. (2011). Globalization, land use, and the invasion of West Nile virus. *Science* 334, 323-327.

Kornfeld, C., Ploquin, M.J.Y., Pandrea, I., Abdourahmane, F., Onanga, R., Apetrei, C., Poaty-Mavoungou, V., Rouquet, P., Estaquier, J., Mortara, L., *et al.* (2005). Antiinflammatory profiles during primary SIV infection in African green monkeys are associated with protection against AIDS. *J Clin Invest* 115, 1082.

Lau, S.K., Woo, P.C., Li, K.S., Huang, Y., Tsoi, H.W., Wong, B.H., Wong, S.S., Leung, S.Y., Chan, K.H., and Yuen, K.Y. (2005). Severe acute respiratory syndrome coronavirus-like virus in Chinese horseshoe bats. *Proceedings of the National Academy of Sciences of the United States of America* 102, 14040-14045.

Lecompte, E., Fichet-Calvet, E., Daffis, S., Koulemou, K., Sylla, O., Kourouma, F., Dore, A., Soropogui, B., Aniskin, V., Allali, B., *et al.* (2006). *Mastomys natalensis* and Lassa fever, West Africa. *Emerg Infect Dis* 12, 1971-1974.

Leroy, E.M., Kumulungui, B., Pourrut, X., Rouquet, P., Hassanin, A., Yaba, P., Delicat, A., Paweska, J.T., Gonzalez, J.P., and Swanepoel, R. (2005). Fruit bats as reservoirs of Ebola virus. *Nature* 438, 575-576.

Li, B., Stefano-Cole, K., Kuhrt, D.M., Gordon, S.N., Else, J.G., Mulenga, J., Allen, S., Sodora, D.L., Silvestri, G., and Derdeyn, C.A. (2010). Nonpathogenic simian immunodeficiency virus infection of sooty mangabeys is not associated with high levels of autologous neutralizing antibodies. *J Virol* 84, 6248-6253.

Li, W., Shi, Z., Yu, M., Ren, W., Smith, C., Epstein, J.H., Wang, H., Cramer, G., Hu, Z., Zhang, H., *et al.* (2005). Bats are natural reservoirs of SARS-like coronaviruses. *Science* 310, 676-679.

Mandl, J.N., Barry, A.P., Vanderford, T.H., Kozyr, N., Chavan, R., Klucking, S., Barrat, F.J., Coffman, R.L., Staprans, S., and Feinberg, M.B. (2008). Divergent TLR7/9 signaling and type I interferon production distinguish pathogenic and non-pathogenic SIV infections. *Nat Med* 14, 1077-1087.

McCrae, A.W., Henderson, B.E., Kirya, B.G., and Sempala, S.D. (1971). Chikungunya virus in the Entebbe area of Uganda: isolations and epidemiology. *Trans R Soc Trop Med Hyg* 65, 152-168.

Memish, Z.A., Mishra, N., Olival, K.J., Fagbo, S.F., Kapoor, V., Epstein, J.H., AlHakeem, R., Durosinioun, A., Al Asmani, M., Islam, A., *et al.* (2013). Middle East respiratory syndrome coronavirus in bats, Saudi Arabia. *Emerg Infect Dis*.

Meyer, B.J., and Schmaljohn, C.S. (2000). Persistent hantavirus infections: characteristics and mechanisms. *Trends in microbiology* 8, 61-67.

Middleton, D.J., Morrissy, C.J., van der Heide, B.M., Russell, G.M., Braun, M.A., Westbury, H.A., Halpin, K., and Daniels, P.W. (2007). Experimental Nipah virus infection in pteropid bats (*Pteropus poliocephalus*). *J Comp Pathol* 136, 266-272.

Middleton, D.J., and Weingartl, H.M. (2012). Henipaviruses in their natural animal hosts. *Current topics in microbiology and immunology* 359, 105-121.

Munster, V.J., Baas, C., Lexmond, P., Waldenstrom, J., Wallensten, A., Fransson, T., Rimmelzwaan, G.F., Beyer, W.E., Schutten, M., Olsen, B., *et al.* (2007). Spatial, temporal, and species variation in prevalence of influenza A viruses in wild migratory birds. *PLoS Path* 3, e61.

Olive, M.M., Goodman, S.M., and Reynes, J.M. (2012). The role of wild mammals in the maintenance of Rift Valley fever virus. *J Wildl Dis* 48, 241-266.

Panda, S.K., Thakral, D., and Rehman, S. (2007). Hepatitis E virus. *Rev Med Virol* 17, 151-180.

Philbey, A.W., Kirkland, P.D., Ross, A.D., Davis, R.J., Gleeson, A.B., Love, R.J., Daniels, P.W., Gould, A.R., and Hyatt, A.D. (1998). An apparently new virus (family Paramyxoviridae) infectious for pigs, humans, and fruit bats. *Emerg Infect Dis* 4, 269-271.

Rupprecht, C.E., Turmelle, A., and Kuzmin, I.V. (2011). A perspective on lyssavirus emergence and perpetuation. *Curr Opin Virol* 1, 662-670.

Schountz, T., and Prescott, J. (2014). Hantavirus immunology of rodent reservoirs: current status and future directions. *Viruses* 6, 1317-1335.

Schountz, T., Prescott, J., Cogswell, A.C., Oko, L., Mirowsky-Garcia, K., Galvez, A.P., and Hjelle, B. (2007). Regulatory T cell-like responses in deer mice persistently infected with Sin Nombre virus. *Proc Natl Acad Sci U S A* 104, 15496-15501.

Silvestri, G., Sodora, D.L., Koup, R.A., Paiardini, M., O'Neil, S.P., McClure, H.M., Staprans, S.I., and Feinberg, M.B. (2003). Nonpathogenic SIV infection of sooty mangabeys is characterized by limited bystander immunopathology despite chronic high-level viremia. *Immunity* 18, 441-452.

Tong, S., Li, Y., Rivailler, P., Conrardy, C., Castillo, D.A., Chen, L.M., Recuenco, S., Ellison, J.A., Davis, C.T., York, I.A., *et al.* (2012). A distinct lineage of influenza A virus from bats. *Proceedings of the National Academy of Sciences of the United States of America* 109, 4269-4274.

Turmelle, A.S., Allen, L.C., Schmidt-French, B.A., Jackson, F.R., Kunz, T.H., McCracken, G.F., and Rupprecht, C.E. (2010). Response to vaccination with a commercial inactivated rabies vaccine in a captive colony of Brazilian free-tailed bats (*Tadarida brasiliensis*). *J Zoo Wildl Med* 41, 140-143.

van Boheemen, S., de Graaf, M., Lauber, C., Bestebroer, T.M., Raj, V.S., Zaki, A.M., Osterhaus, A.D., Haagmans, B.L., Gorbalenya, A.E., Snijder, E.J., *et al.* (2012). Genomic characterization of a newly discovered coronavirus associated with acute respiratory distress syndrome in humans. *mBio* 3.

Webby, R.J., Webster, R.G., and Richt, J.A. (2007). Influenza viruses in animal wildlife populations. *Curr Top Microbiol Immunol* 315, 67-83.

Woodall, J.P. (1968). The reaction of a mangabey monkey (*Cercocebus galeritus agilis* Milne-Edwards) to inoculation with yellow fever virus. *Ann Trop Med Parasitol* 62, 522-527.

Zaki, A.M., van Boheemen, S., Bestebroer, T.M., Osterhaus, A.D., and Fouchier, R.A. (2012). Isolation of a novel coronavirus from a man with pneumonia in Saudi Arabia. *The New England journal of medicine* 367, 1814-1820.
